# Supplementary material for: A Colorimetric Enzyme-Linked Immunosorbent Assay (ELISA) Detection Platform for a Point-of-Care Dengue Detection System on a Lab-on-Compact-Disc
Source: PubMed Central journal article supplement (PMC4481904; doi:10.3390/s150511431), 2015-05-18
Supplement: sensors-15-11431-s001.pdf [file sensors-15-11431-s001.pdf]

*Supplementary Information*

**Colorimetric Enzyme-Linked Immunosorbent Assay (ELISA) Detection Platform for Point-of-Care Dengue Detection System on Lab-on-Compact-Disc. *Sensors* 2015, 15, 11431-11441**

**Aung Thiha<sup>1,2</sup> and Fatimah Ibrahim<sup>1,2,\*</sup>**

<sup>1</sup> Department of Biomedical Engineering, Faculty of Engineering, University of Malaya, 50603 Kuala Lumpur, Malaysia; E-Mail: aungthiha.bme@gmail.com

<sup>2</sup> Centre For Innovation in Medical Engineering, Faculty of Engineering, University of Malaya, 50603 Kuala Lumpur, Malaysia

\* Author to whom correspondence should be addressed; E-Mail: fatimah@um.edu.my; Tel.: +603-7967-6818; Fax: +603-7967-4579.

---

## 1. Sensor Response to Concentration

**Table S1.** Absorbance values over different concentrations.

|    | OD Trial 1 | OD Trial 2 | Mean OD | Estimated OD | Error  | Accuracy (%) | Concentration | % Concentration |
|----|------------|------------|---------|--------------|--------|--------------|---------------|-----------------|
| 1  | 2.297      | 2.321      | 2.309   | 2.309        | 0.000  | 0.000        | 1.000         | 100.000         |
| 2  | 2.095      | 2.120      | 2.108   | 2.101        | -0.006 | -0.300       | 0.910         | 91.000          |
| 3  | 2.102      | 2.109      | 2.106   | 1.916        | -0.189 | -9.863       | 0.830         | 83.000          |
| 4  | 1.868      | 1.869      | 1.869   | 1.639        | -0.229 | -13.975      | 0.710         | 71.000          |
| 5  | 1.710      | 1.719      | 1.715   | 1.443        | -0.271 | -18.805      | 0.625         | 62.500          |
| 6  | 1.323      | 1.337      | 1.330   | 1.155        | -0.176 | -15.201      | 0.500         | 50.000          |
| 7  | 1.139      | 1.149      | 1.144   | 0.947        | -0.197 | -20.842      | 0.410         | 41.000          |
| 8  | 1.094      | 1.100      | 1.097   | 0.808        | -0.289 | -35.742      | 0.350         | 35.000          |
| 9  | 0.843      | 0.831      | 0.837   | 0.716        | -0.121 | -16.934      | 0.310         | 31.000          |
| 10 | 0.613      | 0.672      | 0.643   | 0.577        | -0.065 | -11.304      | 0.250         | 25.000          |
| 11 | 0.430      | 0.467      | 0.449   | 0.462        | 0.013  | 2.880        | 0.200         | 20.000          |
| 12 | 0.053      | 0.107      | 0.080   | 0.231        | 0.151  | 65.353       | 0.100         | 10.000          |
| 13 | 0.000      | 0.000      | 0.000   | 0.115        | 0.115  | 100.000      | 0.050         | 5.000           |

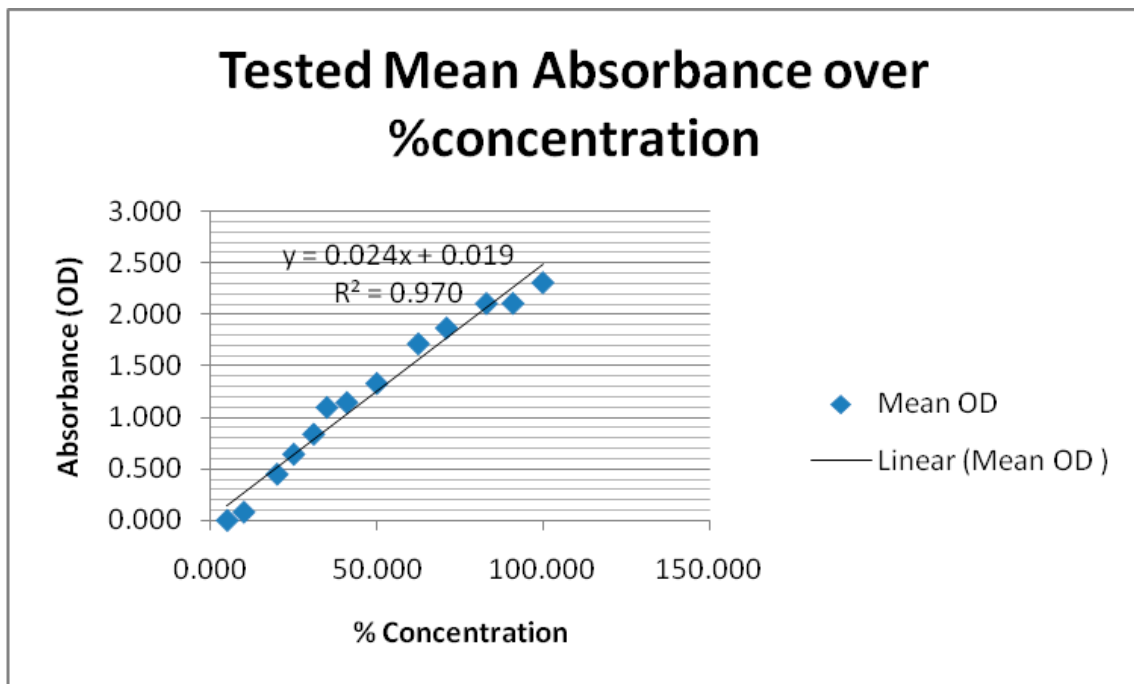

**Figure S1.** Recorded absorbance (OD) over per cent concentration of sample to calibrate sensor response.

## 2. Clinical Trial Results

**Table S2.** Clinical trial results.

| Sample | Microplate Reader | LOCD Reader | Microplate Reader | LOCD Reader | Remark   |
|--------|-------------------|-------------|-------------------|-------------|----------|
| 1      | 2.397             | 3.156       | +                 | +           | +Control |
| 2      | 1.999             | 2.795       | +                 | +           | +Control |
| 3      | 0.049             | 0.000       | -                 | -           | -Control |
| 4      | 0.052             | 0.000       | -                 | -           | -Control |
| 5      | 0.056             | 0.000       | -                 | -           |          |
| 6      | 0.071             | 0.000       | -                 | -           |          |
| 7      | 0.613             | 0.430       | +                 | +           |          |
| 8      | 0.091             | 0.000       | -                 | -           |          |
| 9      | 0.062             | 0.000       | -                 | -           |          |
| 10     | 0.205             | 0.000       | -                 | -           |          |
| 11     | 0.075             | 0.000       | -                 | -           |          |
| 12     | 0.060             | 0.000       | -                 | -           |          |
| 13     | 0.066             | 0.000       | -                 | -           |          |
| 14     | 0.070             | 0.000       | -                 | -           |          |
| 15     | 1.838             | 2.561       | +                 | +           |          |
| 16     | 1.169             | 1.498       | +                 | +           |          |
| 17     | 0.088             | 0.000       | -                 | -           |          |
| 18     | 0.034             | 0.000       | -                 | -           |          |
| 19     | 0.695             | 0.589       | +                 | +           |          |
| 20     | 0.061             | 0.000       | -                 | -           |          |
| 21     | 2.987             | 3.665       | +                 | +           |          |
| 22     | 2.946             | 3.589       | +                 | +           |          |
| 23     | 0.173             | 0.000       | -                 | -           |          |
| 24     | 0.193             | 0.000       | -                 | -           |          |
| 25     | 0.219             | 0.000       | -                 | -           |          |
| 26     | 0.213             | 0.001       | -                 | -           |          |
| 27     | 0.216             | 0.008       | -                 | -           |          |
| 28     | 0.249             | 0.001       | -                 | -           |          |
| 29     | 0.358             | 0.001       | -                 | -           |          |
| 30     | 0.135             | 0.001       | -                 | -           |          |
| 31     | 0.252             | 0.001       | -                 | -           |          |
| 32     | 0.211             | 0.001       | -                 | -           |          |
| 33     | 0.406             | 0.001       | -                 | -           |          |
| 34     | 0.222             | 0.001       | -                 | -           |          |
| 35     | 0.272             | 0.001       | -                 | -           |          |
| 36     | 0.221             | 0.259       | -                 | -           |          |
| 37     | 0.360             | 0.240       | -                 | -           |          |
| 38     | 0.313             | 0.167       | -                 | -           |          |
| 39     | 0.233             | 0.000       | -                 | -           |          |
| 40     | 0.522             | 0.357       | +                 | +           |          |
| 41     | 2.601             | 2.774       | +                 | +           |          |
| 42     | 2.267             | 2.002       | +                 | +           |          |

**Table S2. Cont.**

|           |       |       |   |   |
|-----------|-------|-------|---|---|
| <b>43</b> | 0.059 | 0.000 | – | – |
| <b>44</b> | 0.055 | 0.000 | – | – |
| <b>45</b> | 0.058 | 0.000 | – | – |
| <b>46</b> | 0.212 | 0.001 | – | – |
| <b>47</b> | 0.191 | 0.000 | – | – |
| <b>48</b> | 0.087 | 0.000 | – | – |
| <b>49</b> | 0.086 | 0.000 | – | – |
| <b>50</b> | 1.906 | 2.199 | + | + |
| <b>51</b> | 0.868 | 0.789 | + | + |
| <b>52</b> | 2.598 | 3.179 | + | + |
| <b>53</b> | 0.069 | 0.000 | – | – |
| <b>54</b> | 0.708 | 0.420 | + | + |
| <b>55</b> | 0.591 | 0.450 | + | + |
| <b>56</b> | 0.084 | 0.000 | – | – |
| <b>57</b> | 0.168 | 0.000 | – | – |
| <b>58</b> | 0.124 | 0.000 | – | – |
| <b>59</b> | 1.849 | 2.265 | + | + |
| <b>60</b> | 0.657 | 0.345 | + | + |
| <b>61</b> | 0.172 | 0.000 | – | – |
| <b>62</b> | 0.105 | 0.000 | – | – |
| <b>63</b> | 0.541 | 0.360 | + | + |
| <b>64</b> | 0.520 | 0.195 | + | – |
| <b>65</b> | 0.213 | 0.149 | – | – |
| <b>66</b> | 0.582 | 0.430 | + | + |
| <b>67</b> | 0.193 | 0.000 | – | – |
| <b>68</b> | 0.612 | 0.554 | + | + |

3. Statistical Analysis Results in Analyze-It Software

Table S3. Regression line characteristics.

|                     | Bias            | 95% CI         | SE    | p       |
|---------------------|-----------------|----------------|-------|---------|
| <b>Constant</b>     | -0.2            | -0.25 to -0.15 | 0.027 | <0.0001 |
| <b>Proportional</b> | 1.27            | 1.21 to 1.32   | 0.027 | <0.0001 |
| <b>Range</b>        | 0.034 to 0.9870 |                |       |         |
| <b>r</b>            | 0.985           |                |       |         |
| <b>Sy x</b>         | 0.1765          |                |       |         |

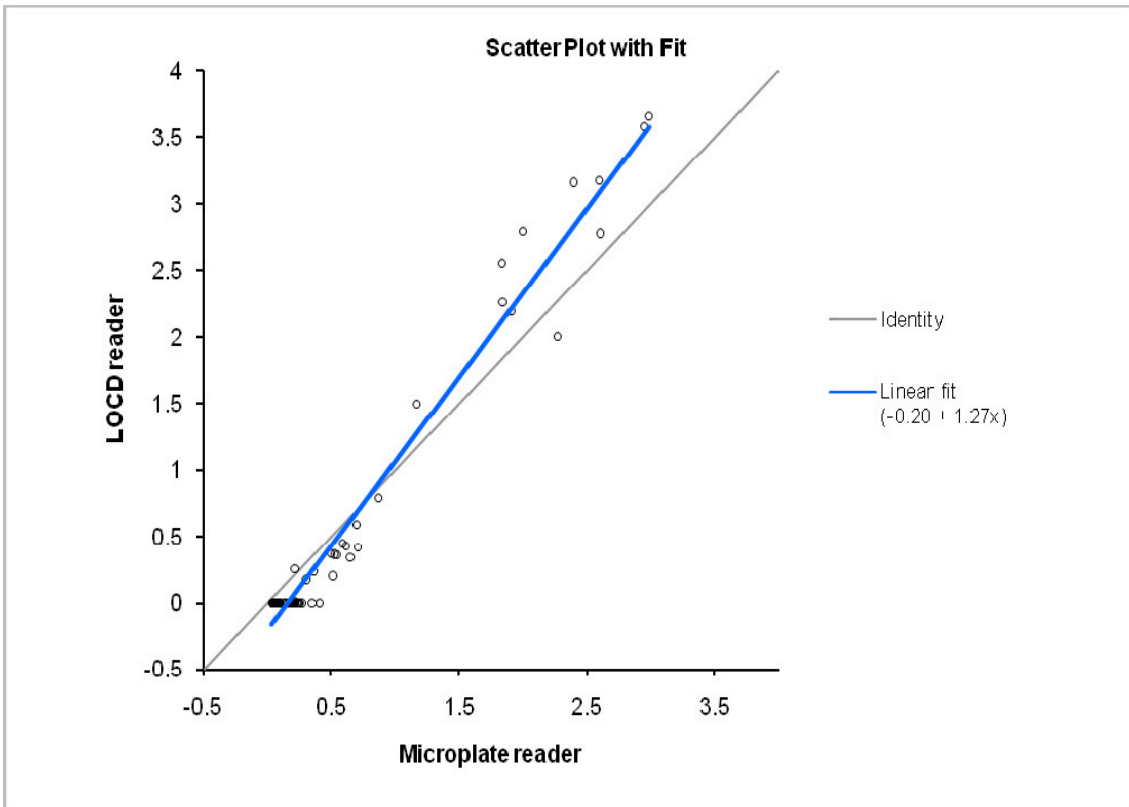

Figure S2. Correlation and linearity of the result.

Table S4. Results of LOCD reader device compared to a microplate reader.

|             | Microplate Reader |          |       |    |
|-------------|-------------------|----------|-------|----|
|             | Dengue +          | Dengue - | Total |    |
| LOCD reader | Dengue +          | 20       | 0     | 20 |
|             | Dengue -          | 1        | 43    | 44 |
|             | Total             | 21       | 43    | 64 |

**Table S5.** LOCD reader qualitative statistical analysis outcome.

| LOCD Reader               | Outcomes  | 95% CI         |
|---------------------------|-----------|----------------|
| Sensitivity—TP proportion | 0.952     | 0.762 to 0.999 |
| Specificity—TN proportion | 1         | 0.918 to 1.000 |
| FP proportion             | 0         | 0 to 0.082     |
| FN proportion             | 0.048     | 0.001 to 0.238 |
| Likelihood ratio (+)      | $+\infty$ |                |
| Likelihood ratio (-)      | 0.05      |                |

(TP = true positive, TN = true negative, FP = false positive, FN = false negative).

**Table S6.** Receiver Operating Characteristic (ROC) analyses of the result.

| Test                            | Area       | 95% CI    | SE    | Dengue = +         |        |
|---------------------------------|------------|-----------|-------|--------------------|--------|
| Microplate reader               | 1          | 1 to 1.00 | 0.002 | have higher values |        |
| LOCD reader                     | 1          | 1 to 1.00 | 0     | have higher values |        |
| Contrast                        | Difference | 95% CI    | SE    | Z                  | p      |
| Microplate reader v LOCD reader | 0          | 0 to 0.00 | 0.002 | -0.71              | 0.4795 |

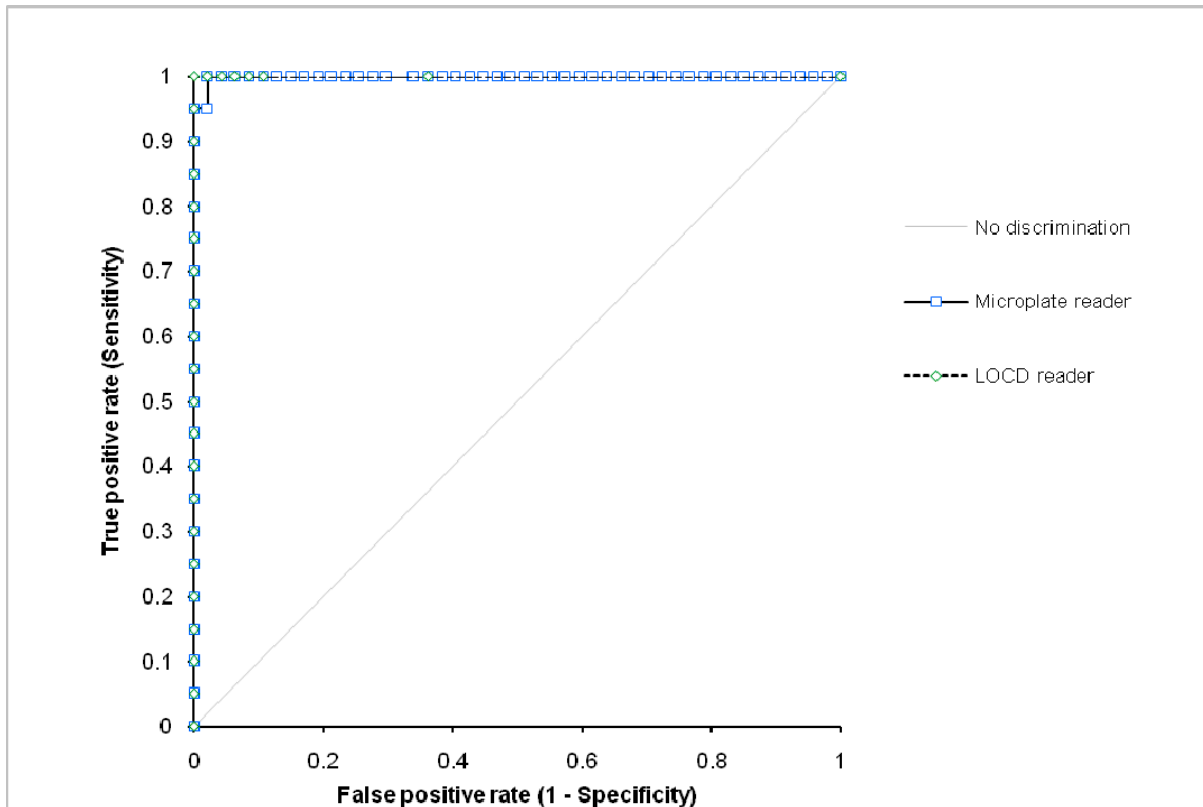**Figure S3.** ROC curves of LOCD and Microplate reader results from sample of n = 64.

#### 4. Flowchart to Evaluate Clinical Diagnostic Results

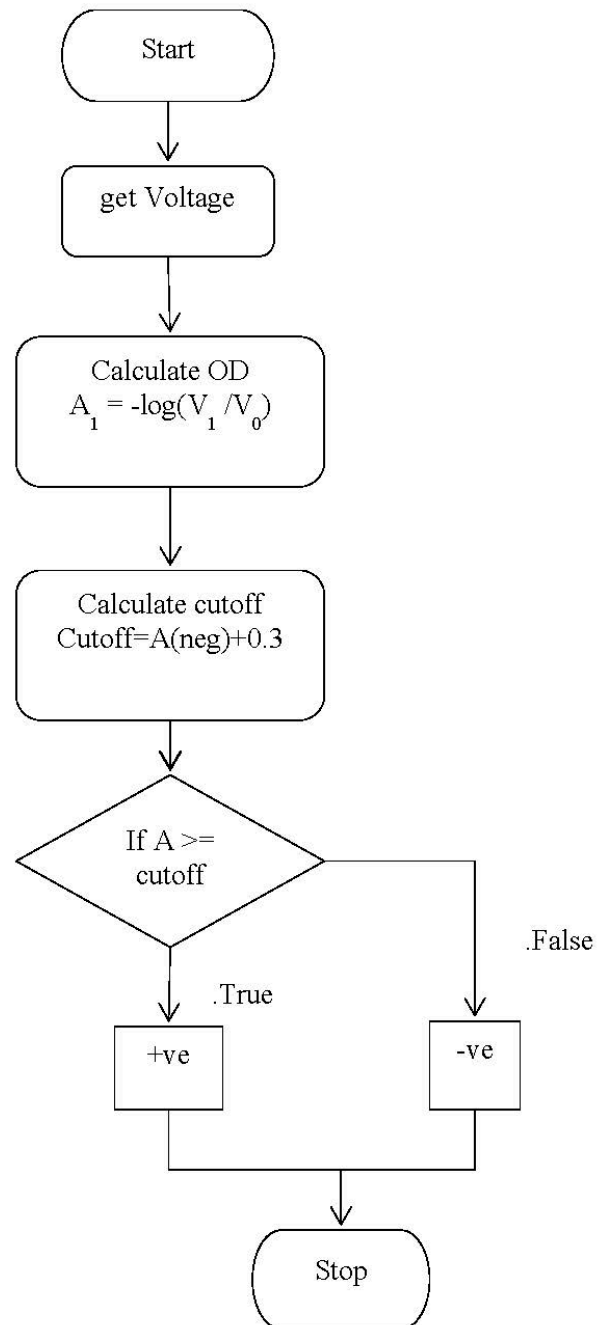

**Figure S4.** Flowchart to evaluate clinical diagnostic results.

### 5. Design and Construction of the CD for Evaluation of the Constructed Sensor

CD is constructed from three layers of PMMA bonded by two Pressure Sensitive Adhesive (PSA) layers. The CD is designed in computer aided drawing and cut by a CNC machine. The layers are bonded by applying a pressure activated PSA. The device has 20 chambers which have the same dimensions as the wells in a microtiter plate. The CD has a diameter of 130 mm and overall height of 16 mm. This CD is specifically designed for evaluation of the sensor.

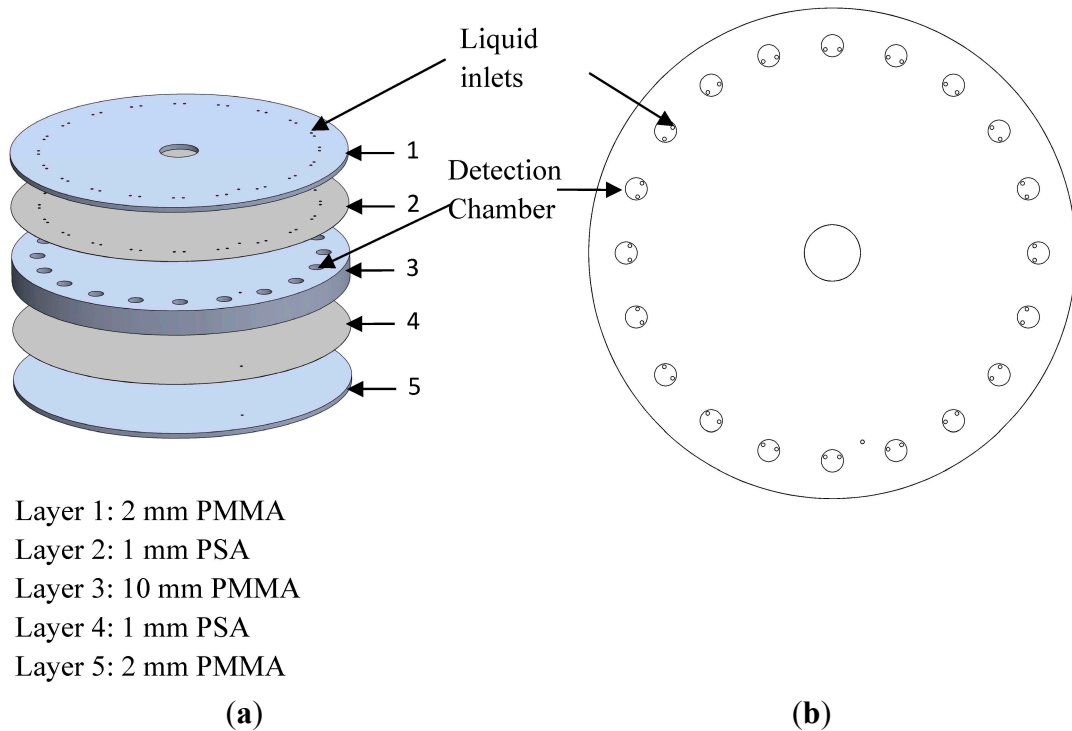

**Figure S5.** (a) Exploded view of Lab-on Compact Disc (LOCD) for evaluation of the sensor; (b) 2D top view of CD.



6. Circuit Diagram of the Detection System for ELISA on LOCD

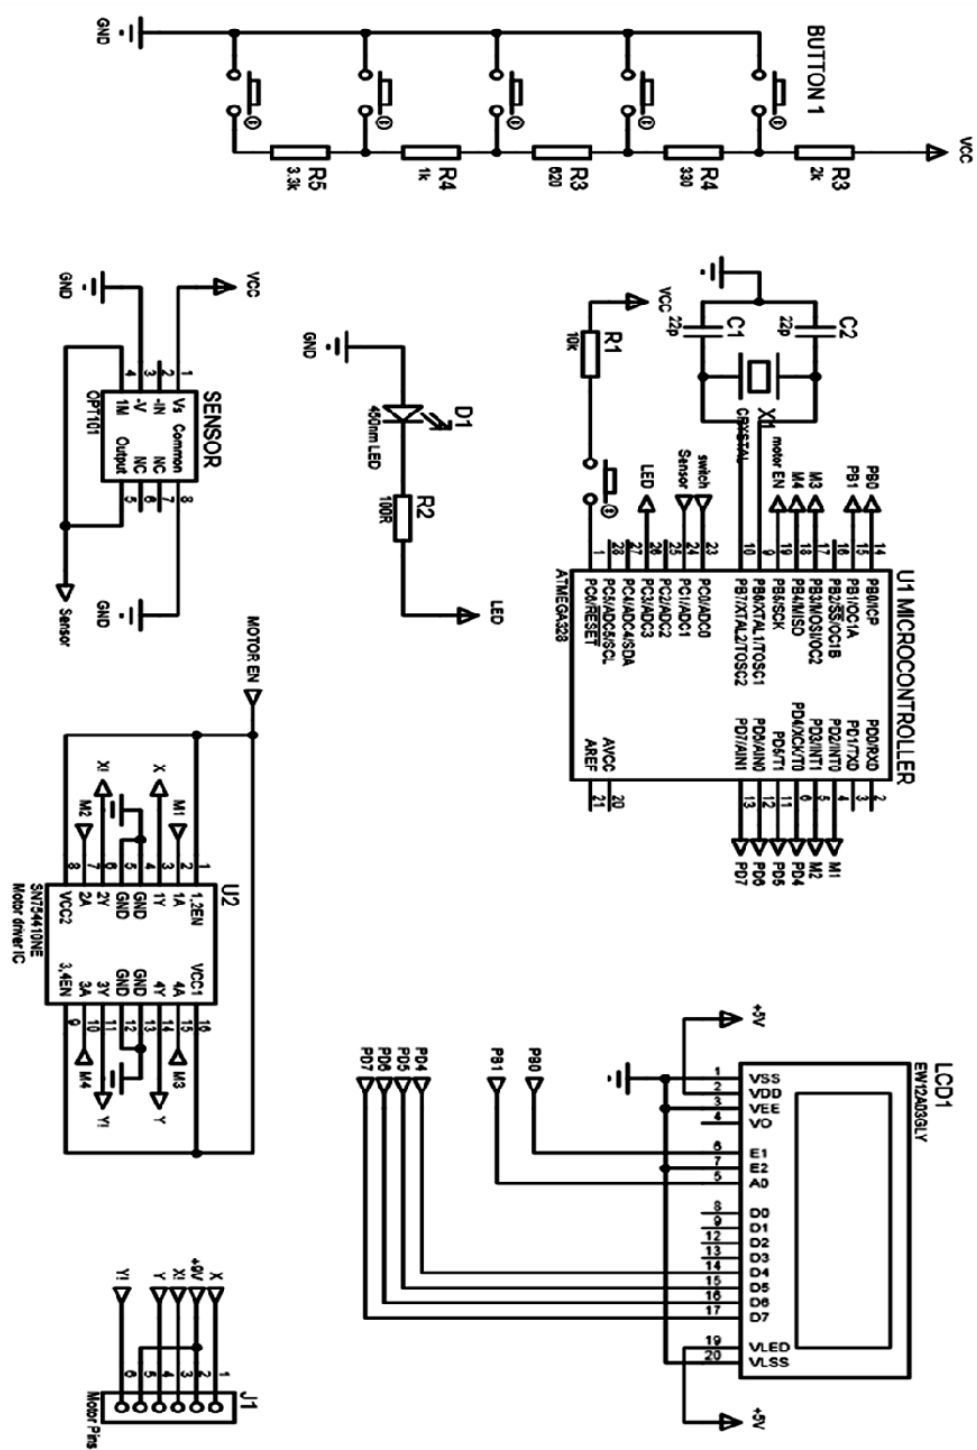

Figure S6. Circuit diagram of the detection system for ELISA on LOCD.

© 2015 by the authors; licensee MDPI, Basel, Switzerland. This article is an open access article distributed under the terms and conditions of the Creative Commons Attribution license (<http://creativecommons.org/licenses/by/4.0/>).
